# Supplementary material for: Self-assembled polymetallic square grids ([2 × 2] M4, [3 × 3] M9) and trigonal bipyramidal clusters (M5)—structural and magnetic properties
Source: Royal Society of Chemistry journal article supplement (doi:10.1039/b602595a), 2006-01-01
Supplement: b602595a.pdf [file b602595a.pdf]

### Supplementary information

Fig. S1. Plot of  $\mu_{\text{mol}}$  as a function of temperature for **4** (the solid line is calculated with  $g = 2.102(3)$ ,  $J = 7.2(5) \text{ cm}^{-1}$ ,  $\theta = -0.2 \text{ K}$ ,  $\text{TIP} = 250 \cdot 10^{-6} \text{ cm}^3 \text{ mol}^{-1}$ ,  $\rho = 0$  ( $10^2 R = 0.44$ )).

Fig. S2. Plot of  $M/H$  for **4** at 2K (the solid line is calculated from the appropriate Brillouin function with  $g = 2.08$ ,  $T = 2\text{K}$ ,  $S' = 2$ ).

Fig. S3. Plot of  $\mu_{\text{mol}}$  as a function of temperature for **6** (the solid line is calculated with  $g = 2.015$ ,  $J = -2.65 \text{ cm}^{-1}$ ,  $\rho = 0.0001$ ,  $\text{TIP} = 0 \text{ cm}^3 \text{ mol}^{-1}$  ( $10^2 R = 0.44$ )).

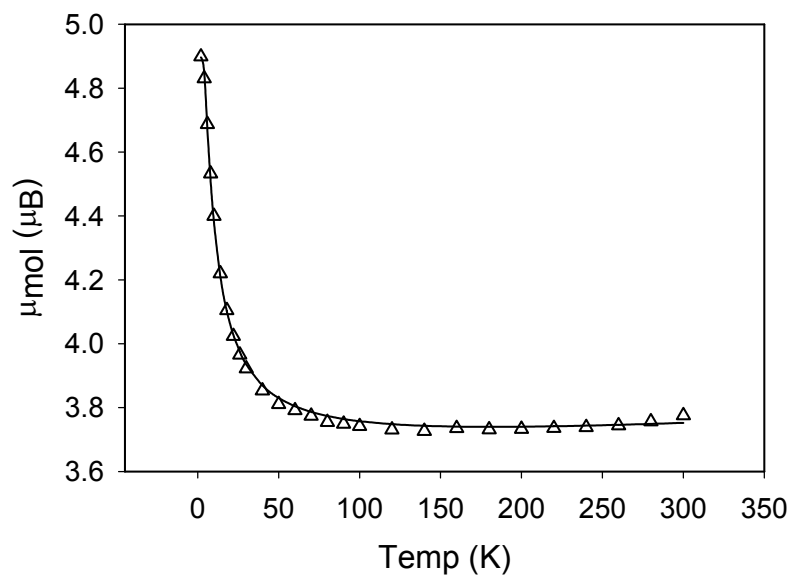

Fig. S1

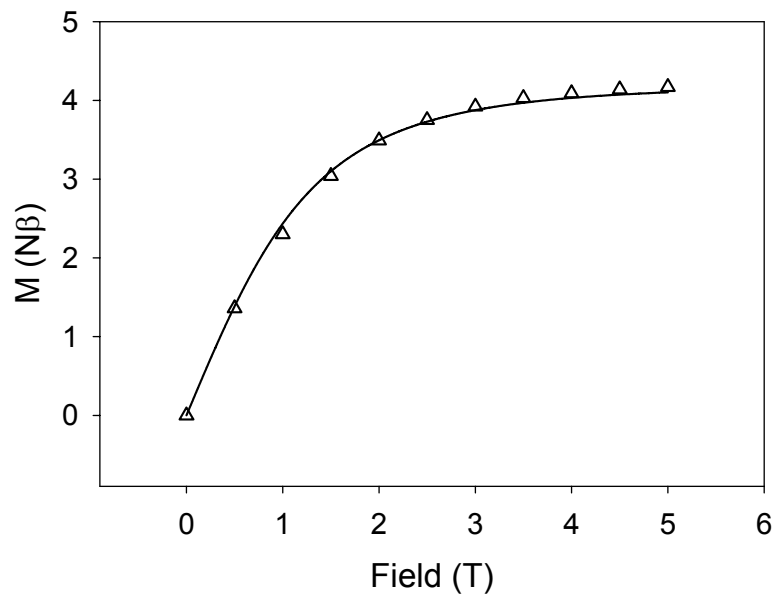

Fig. S2

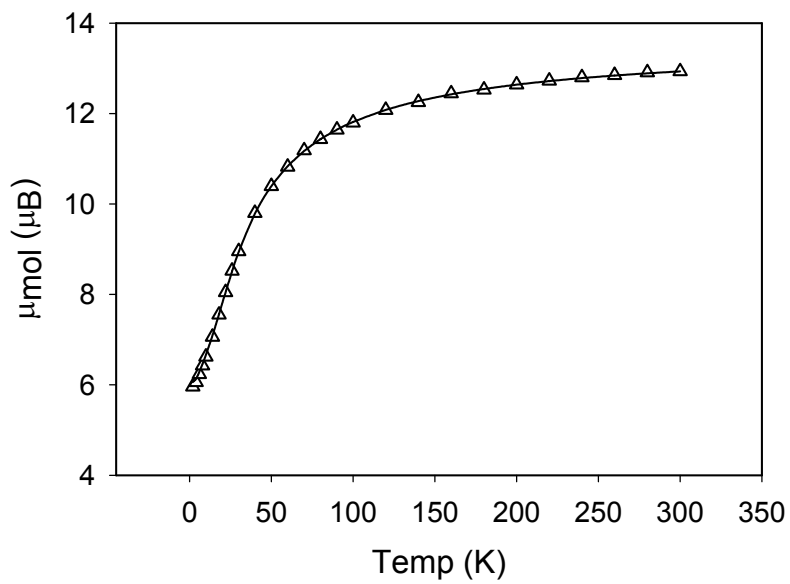

Fig. S3
